# Supplementary material for: Evaluating the variation in the projected benefit of community-wide mass treatment for schistosomiasis: Implications for future economic evaluations
Source: PubMed Central journal article supplement (PMC5410074; doi:10.1186/s13071-017-2141-5), 2017-04-28
Supplement: 13071_2017_2141_MOESM1_ESM.pdf [file 13071_2017_2141_MOESM1_ESM.pdf]

# Supplementary information

## The Model

The fundamental model used to describe the mean worm burden of individuals of a given age and the quantity of infectious eggs in the environment was developed from the founding work of Anderson and May [1]. The current version of the model is described in detail in [2-5].

The key parameters in Supporting Table 1 and Supporting Table 2.

The model was further adapted to allow for systematic non-compliance (individuals never taking treatment) [6, 7]. A more detailed description of the model is provided in Truscott *et al.* [8].

**Supporting Table S1: Model parameters for *Schistosoma mansoni***

| <b>Parameter</b>                                                                                   | <b>Value</b>                            | <b>Source</b> |
|----------------------------------------------------------------------------------------------------|-----------------------------------------|---------------|
| <b>Adult worm life expectancy</b>                                                                  | 5.71 years                              | [9, 10]       |
| <b>Aggregation parameter, <math>k</math></b>                                                       | 0.24                                    | [11]          |
| <b>Density dependence fecundity, <math>\gamma</math></b>                                           | 0.0007/female worm                      | [3]           |
| <b>Drug efficacy (proportion of worms killed by praziquantel)</b>                                  | 0.86                                    | [12]          |
| <b>Egg output per female worm in absence of density dependence (in terms of faecal egg counts)</b> | 0.14                                    | [13]          |
| <b>Human demography</b>                                                                            | Based on Uganda's demographical profile | [14, 15]      |
| <b>Life expectancy of the infected snails</b>                                                      | 4 weeks                                 | [16]          |

## Baseline scenarios

Based on the available data [3], we developed three age-intensity profiles representing a range of possible scenarios regarding the relative burden in adults.

When changing the assumed the life span of the adult worms, the age-specific parameters for the exposure and contribution to the infectious reservoir were refitted – so that the shape of the age profile does not change.

**Supporting Table S2: Model for the three age-intensity profiles**

| <b>Parameter</b>                                                                    | <b>Setting 1: Low burden in adults</b> | <b>Setting 2: Medium burden in adults</b> | <b>Setting 3: High burden in adults</b> |
|-------------------------------------------------------------------------------------|----------------------------------------|-------------------------------------------|-----------------------------------------|
| <b><u>5.71 year average lifespan</u></b>                                            |                                        |                                           |                                         |
| <b>Basic Reproductive number (Lower setting)</b>                                    | 1.30485                                | 1.31547                                   | 1.30577                                 |
| <b>Basic Reproductive number (Higher setting)</b>                                   | 1.6687                                 | 1.68                                      | 1.62886                                 |
| <b>Age specific degree of exposure and contribution to the infectious reservoir</b> | 0-5 year olds: 0.01                    | 0-5 year olds: 0.032                      | 0-5 year olds: 0.01                     |
|                                                                                     | 5-10 year olds: 1.2                    | 5-10 year olds: 0.61                      | 5-12 year olds: 0.61                    |
|                                                                                     | 10-16 year olds: 1                     | 10-16 year olds: 1                        | 12-20 year olds: 1                      |
|                                                                                     | 16+ year olds: 0.02                    | 16+ year olds: 0.06                       | 20+ year olds: 0.12                     |
| <b><u>4 year average lifespan</u></b>                                               |                                        |                                           |                                         |
| <b>Basic Reproductive number (Lower setting)</b>                                    | 1.33155                                | 1.3638                                    | 1.325568                                |
| <b>Basic Reproductive number (Higher setting)</b>                                   | 1.7752                                 | 1.83495                                   | 1.6778                                  |
| <b>Age specific degree of exposure and contribution to the infectious reservoir</b> | 0-5 year olds: 0.32                    | 0-5 year olds: 0.032                      | 0-5 year olds: 0.01                     |
|                                                                                     | 5-10 year olds: 4.95                   | 5-10 year olds: 0.14                      | 5-12 year olds: 0.5                     |
|                                                                                     | 10-16 year olds: 1                     | 10-16 year olds: 1                        | 12-20 year olds: 1                      |
|                                                                                     | 16+ year olds: 0.065                   | 16+ year olds: 0.09                       | 20+ year olds: 0.14                     |

*The model was used to simulate two transmission settings; a higher transmission setting with an age-weighted mean worm burden of 155, and a lower transmission setting with a mean worm burden of 60. The data used to define the three scenarios is presented in [3].*

The model was used to simulate two transmission settings; a higher transmission setting with an age-weighted mean worm burden of 155 (based on model fits to the data [5]), and a lower transmission setting with a mean worm burden of 60. To ensure the results for the different scenarios are comparable, the  $R_0$  was adjusted such that the different scenarios had the same pre-control mean worm burden (i.e. we ensured that we are not comparing the impact of both a different age-infection profile and a different pre-control burden when comparing the different scenarios).

**Supporting Table S3: Sensitivity of the relative increase in effectiveness when using annual community-wide versus school-based treatment to the treatment coverage in adults (55% vs. 75%).**

| Metric                       | Relative pre-control worm burden in adults | Relative increase in effectiveness |                            |
|------------------------------|--------------------------------------------|------------------------------------|----------------------------|
|                              |                                            | Higher transmission setting        | Lower transmission setting |
| Worm-years averted           | Low                                        | 15-17%                             | 13-15%                     |
|                              | Medium                                     | 27-30%                             | 20-23%                     |
|                              | High                                       | 72-80%                             | 55-59%                     |
| Prevalent case years averted | Low                                        | 68-83%                             | 59-70%                     |
|                              | Medium                                     | 101-124%                           | 83-99%                     |
|                              | High                                       | 228-303%                           | 204-258%                   |
| Heavy case years averted     | Low                                        | 21-23%                             | 11-12%                     |
|                              | Medium                                     | 39-43%                             | 16-18%                     |
|                              | High                                       | 107-118%                           | 49-52%                     |

*The range in each cell shows the variation in the relative increase in effectiveness when using annual community-wide versus school-based treatment to the assumed level of treatment coverage in adults (55% vs. 75%). The scenarios for the relative pre-control burden in adults are shown in Figure 2 (note they have the same age-weighted overall mean worm burden). The results assume 5% systematic non-compliance and 75% treatment coverage of SAC. The analysis was conducted with a five-year implementation period and a 15-year time horizon (i.e. looking at the impact of five years of treatment over 15 years).*

**Supporting Table S4: Sensitivity of the relative increase in effectiveness when using annual community-wide versus school-based treatment to the assumed mean life expectancy of the adult worms (4 years vs. 5.71 years).**

| Metric                       | Relative pre-control worm burden in adults | Relative increase in effectiveness |                            |
|------------------------------|--------------------------------------------|------------------------------------|----------------------------|
|                              |                                            | Higher transmission setting        | Lower transmission setting |
| Worm-years averted           | Low                                        | 7-17%                              | 5-15%                      |
|                              | Medium                                     | 30-55%                             | 23-30%                     |
|                              | High                                       | 80-94%                             | 59-61%                     |
| Prevalent case years averted | Low                                        | 70-83%                             | 47-70%                     |
|                              | Medium                                     | 124-182%                           | 99-149%                    |
|                              | High                                       | 303-359%                           | 258-302%                   |
| Heavy case years averted     | Low                                        | 10-23%                             | 4-12%                      |
|                              | Medium                                     | 43-83%                             | 18-26%                     |
|                              | High                                       | 118-139%                           | 52-54%                     |

*The range in each cell shows the variation in the relative increase in effectiveness when using annual community-wide versus school-based treatment to the assumed mean life expectancy of the adult worms (4 years vs. 5.71 years). The scenarios for the relative pre-control burden in adults are shown in Figure 2 (note they have the same age-weighted overall mean worm burden). The results assume a treatment coverage of 75% and 5% systematic non-compliance. The analysis was conducted with a five-year implementation period and a 15-year time horizon (i.e. looking at the impact of five years of treatment over 15 years).*

**Supporting Table S5: Sensitivity of the relative increase in effectiveness when using annual community-wide versus school-based treatment to the assumed level of systematic non-compliance (0% vs 20%).**

| Metric                       | Relative pre-control worm burden in adults | Relative increase in effectiveness |                            |
|------------------------------|--------------------------------------------|------------------------------------|----------------------------|
|                              |                                            | Higher transmission setting        | Lower transmission setting |
| Worm-years averted           | Low                                        | 16-17%                             | 14-15%                     |
|                              | Medium                                     | 28-30%                             | 22-22%                     |
|                              | High                                       | 76-81%                             | 59-60%                     |
| Prevalent case years averted | Low                                        | 58-124%                            | 49-98%                     |
|                              | Medium                                     | 74-195%                            | 60-252%                    |
|                              | High                                       | 178-491%                           | 154-408%                   |
| Heavy case years averted     | Low                                        | 21-25%                             | 12-13%                     |
|                              | Medium                                     | 40-42%                             | 17-21%                     |
|                              | High                                       | 111-114%                           | 48-60%                     |

*The range in each cell shows the variation in the relative increase in effectiveness when using annual community-wide versus school-based treatment to the assumed level of systematic non-compliance (0% vs. 20%). The scenarios for the relative pre-control burden in adults are shown in Figure 2 (note they have the same age-weighted overall mean worm burden). The results assume a treatment coverage of 75%. The analysis was conducted with a five-year implementation period and a 15-year time horizon (i.e. looking at the impact of five years of treatment over 15 years).*

**Supporting Table S6: Relative increase in effectiveness when using annual community-wide versus school-based treatment when assuming poor school enrolment.**

| Metric                       | Relative pre-control worm burden in adults | Relative increase in effectiveness |                            |
|------------------------------|--------------------------------------------|------------------------------------|----------------------------|
|                              |                                            | Higher transmission setting        | Lower transmission setting |
| Worm-years averted           | Low                                        | 32%                                | 23%                        |
|                              | Medium                                     | 45%                                | 33%                        |
|                              | High                                       | 98%                                | 74%                        |
| Prevalent case years averted | Low                                        | 169%                               | 146%                       |
|                              | Medium                                     | 205%                               | 168%                       |
|                              | High                                       | 381%                               | 330%                       |
| Heavy case years averted     | Low                                        | 51%                                | 18%                        |
|                              | Medium                                     | 70%                                | 26%                        |
|                              | High                                       | 149%                               | 67%                        |

*The results assume the systematic non-compliance rate is 20% for the school-based programme, and 5% when using community-wide mass treatment (simulating a scenario where many of the non-enrolled SAC are only reached when using a community-based programme). The scenarios for the relative pre-control burden in adults are shown in Figure 2 (note they have the same age-weighted overall mean worm burden). The treatment coverage was assumed to be 75%. The analysis was conducted with a five-year implementation period and a 15-year time horizon (i.e. looking at the impact of five years of treatment over 15 years).*

**Supporting Table S7: The effect of using different fitting methods to account for the age-intensity profile on the projected incremental increase in effectiveness when using annual community-wide versus school-based treatment.**

|                                                    | <b>When fitting to fully age structured data</b> | <b>When only fitting to the mean burdens in children and adults</b> | <b>Percentage difference between the two fitting methods</b> |
|----------------------------------------------------|--------------------------------------------------|---------------------------------------------------------------------|--------------------------------------------------------------|
| Average number of worm-years averted per person    | 645.38                                           | 830.58                                                              | 29%                                                          |
| Prevalent case years averted (per 100 individuals) | 308.39                                           | 439.36                                                              | 42%                                                          |
| Heavy case years averted (per 100 individuals)     | 56.43                                            | 77.45                                                               | 31%                                                          |

*In the first results column the model was fitted to fully age-structured data (and therefore accounts for the true shape of the age-intensity profile) [5]. In the second results column, the model was only fitted to reproduce the estimated mean pre-control worm burdens in SAC and adults from the same dataset. The data used in this example is from the Iietune village (Kenya) [60]. The results assume a treatment coverage of 75% and no systematic non-compliance. The analysis was conducted with a five-year implementation period and a 15-year time horizon (i.e. looking at the effect of five years of treatment for 15 years).*

Evaluating the variation in the projected benefit of community-wide mass treatment for schistosomiasis: Implications for future economic evaluations

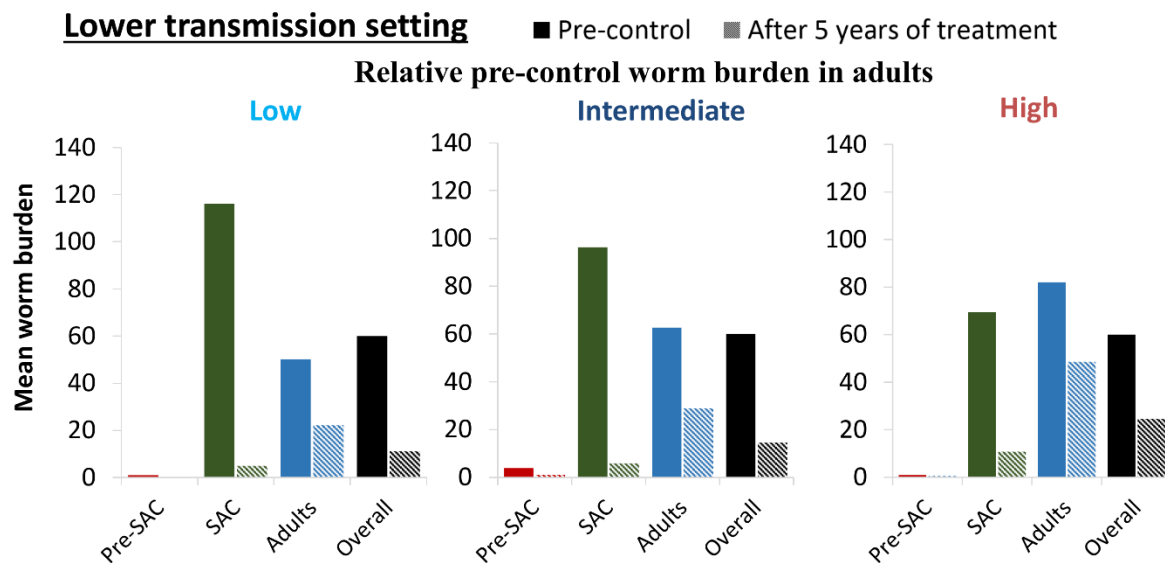

**Supporting Figure S1: The impact of annual school-based treatment on the mean worm burden in different age groups in three settings with a different relative pre-control worm burden in adults.** The solid bars represent the pre-control burden and the hashed bars, the burden after 5 years of treatment. The scenarios for the relative pre-control burden in adults are shown in Figure 2 (note they have the same age-weighted overall mean worm burden). The results assume a treatment coverage of 75% and 5% systematic non-compliance. The results pertaining to the higher transmission setting are shown in Figure 4. Pre-SAC: 2-4 year-olds, SAC: 5-14 year-olds and adults:  $\geq 15$  year-olds.



Evaluating the variation in the projected benefit of community-wide mass treatment for schistosomiasis: Implications for future economic evaluations

### Relative pre-control worm burden in adults

Low

Intermediate

High

#### 20% systematic non-compliance

| Coverage of SAC (%) | Coverage of adults (%) |     |     |     |     |     | 0%  | Coverage of adults (%) |     |     |     |     |     | 0%  | Coverage of adults (%) |     |     |     |     |     |
|---------------------|------------------------|-----|-----|-----|-----|-----|-----|------------------------|-----|-----|-----|-----|-----|-----|------------------------|-----|-----|-----|-----|-----|
|                     | 0%                     | 20% | 40% | 60% | 80% | 95% |     | 0%                     | 20% | 40% | 60% | 80% | 95% |     | 0%                     | 20% | 40% | 60% | 80% | 95% |
| 0%                  | NA                     | NA  | NA  | NA  | NA  | -   | 0%  | NA                     | NA  | NA  | NA  | NA  | -   | 0%  | NA                     | NA  | NA  | NA  | NA  | -   |
| 20%                 | NA                     | NA  | NA  | NA  | NA  | -   | 20% | NA                     | NA  | NA  | NA  | NA  | -   | 20% | NA                     | NA  | 13  | 11  | 10  | -   |
| 40%                 | 10                     | 10  | 10  | 9   | 9   | -   | 40% | 12                     | 10  | 10  | 10  | 9   | -   | 40% | NA                     | 11  | 9   | 8   | 7   | -   |
| 60%                 | 7                      | 7   | 7   | 7   | 7   | -   | 60% | 9                      | 8   | 7   | 7   | 7   | -   | 60% | 14                     | 9   | 7   | 6   | 6   | -   |
| 80%                 | 6                      | 6   | 6   | 6   | 6   | -   | 80% | 8                      | 7   | 6   | 6   | 6   | -   | 80% | 12                     | 8   | 6   | 6   | 5   | -   |
| 95%                 | -                      | -   | -   | -   | -   | -   | 95% | -                      | -   | -   | -   | -   | -   | 95% | -                      | -   | -   | -   | -   | -   |

#### 0% systematic non-compliance

| Coverage of SAC (%) | Coverage of adults (%) |     |     |     |     |     | 0%  | Coverage of adults (%) |     |     |     |     |     | 0%  | Coverage of adults (%) |     |     |     |     |     |
|---------------------|------------------------|-----|-----|-----|-----|-----|-----|------------------------|-----|-----|-----|-----|-----|-----|------------------------|-----|-----|-----|-----|-----|
|                     | 0%                     | 20% | 40% | 60% | 80% | 95% |     | 0%                     | 20% | 40% | 60% | 80% | 95% |     | 0%                     | 20% | 40% | 60% | 80% | 95% |
| 0%                  | NA                     | NA  | NA  | NA  | NA  | NA  | 0%  | NA                     | NA  | NA  | NA  | NA  | NA  | 0%  | NA                     | NA  | NA  | NA  | 15  | 14  |
| 20%                 | NA                     | NA  | NA  | 15  | 15  | 15  | 20% | NA                     | NA  | 15  | 14  | 14  | 13  | 20% | NA                     | 14  | 10  | 8   | 7   | 7   |
| 40%                 | 8                      | 7   | 7   | 7   | 7   | 7   | 40% | 10                     | 8   | 7   | 7   | 7   | 7   | 40% | 15                     | 9   | 6   | 5   | 5   | 4   |
| 60%                 | 5                      | 5   | 4   | 4   | 4   | 4   | 60% | 6                      | 5   | 5   | 4   | 4   | 4   | 60% | 11                     | 6   | 5   | 4   | 3   | 3   |
| 80%                 | 3                      | 3   | 3   | 3   | 3   | 3   | 80% | 5                      | 4   | 3   | 3   | 3   | 3   | 80% | 9                      | 5   | 4   | 3   | 3   | 2   |
| 95%                 | 3                      | 2   | 2   | 2   | 2   | 2   | 95% | 4                      | 3   | 3   | 2   | 2   | 2   | 95% | 8                      | 5   | 3   | 3   | 2   | 2   |

**Supporting Figure S2: Sensitivity of the number of years of annual treatment to achieve elimination of *Schistosoma mansoni* to the assumed level of systematic non-compliance.** The scenarios for the relative pre-control burden in adults are shown in Figure 2 (note they have the same age-weighted overall mean worm burden). The results use the parameters for the lower transmission setting. When assuming a systematic non-compliance rate of 20% it is not possible to get 95% coverage (indicated by a dash on the figure). NA; Not achievable within 15 years of annual treatment.

Evaluating the variation in the projected benefit of community-wide mass treatment for schistosomiasis: Implications for future economic evaluations

Relative pre-control worm burden in adults

Low

Intermediate

High

**Assuming a mean worm life expectancy of 4 years**

| Coverage of SAC (%) | Coverage of adults (%) |     |     |     |     |     | Coverage of adults (%) |     |     |     |     |     | Coverage of adults (%) |     |     |     |     |     |    |    |
|---------------------|------------------------|-----|-----|-----|-----|-----|------------------------|-----|-----|-----|-----|-----|------------------------|-----|-----|-----|-----|-----|----|----|
|                     | 0%                     | 20% | 40% | 60% | 80% | 95% | 0%                     | 20% | 40% | 60% | 80% | 95% | 0%                     | 20% | 40% | 60% | 80% | 95% |    |    |
| 0%                  | NA                     | NA  | NA  | NA  | NA  | NA  | 0%                     | NA  | NA  | NA  | NA  | NA  | NA                     | 0%  | NA  | NA  | NA  | NA  | NA | NA |
| 20%                 | NA                     | NA  | NA  | NA  | NA  | NA  | 20%                    | NA  | NA  | NA  | NA  | NA  | NA                     | 20% | NA  | NA  | 11  | 9   | 8  | 7  |
| 40%                 | 11                     | 10  | 10  | 10  | 10  | 10  | 40%                    | NA  | 12  | 10  | 9   | 9   | 8                      | 40% | NA  | 10  | 7   | 6   | 5  | 5  |
| 60%                 | 7                      | 7   | 6   | 6   | 6   | 6   | 60%                    | 11  | 8   | 7   | 6   | 6   | 6                      | 60% | 13  | 8   | 6   | 5   | 4  | 4  |
| 80%                 | 5                      | 5   | 5   | 5   | 5   | 5   | 80%                    | 9   | 6   | 5   | 5   | 4   | 4                      | 80% | 11  | 7   | 5   | 4   | 3  | 3  |
| 95%                 | 4                      | 4   | 4   | 4   | 4   | 4   | 95%                    | 8   | 6   | 5   | 4   | 3   | 3                      | 95% | 10  | 6   | 4   | 3   | 3  | 2  |

**Assuming a mean worm life expectancy of 5.71 years (baseline assumption)**

| Coverage of SAC (%) | Coverage of adults (%) |     |     |     |     |     | Coverage of adults (%) |     |     |     |     |     | Coverage of adults (%) |     |     |     |     |     |    |    |
|---------------------|------------------------|-----|-----|-----|-----|-----|------------------------|-----|-----|-----|-----|-----|------------------------|-----|-----|-----|-----|-----|----|----|
|                     | 0%                     | 20% | 40% | 60% | 80% | 95% | 0%                     | 20% | 40% | 60% | 80% | 95% | 0%                     | 20% | 40% | 60% | 80% | 95% |    |    |
| 0%                  | NA                     | NA  | NA  | NA  | NA  | NA  | 0%                     | NA  | NA  | NA  | NA  | NA  | NA                     | 0%  | NA  | NA  | NA  | NA  | NA | 15 |
| 20%                 | NA                     | NA  | NA  | NA  | 15  | 15  | 20%                    | NA  | NA  | NA  | 15  | 14  | 14                     | 20% | NA  | 15  | 11  | 9   | 8  | 7  |
| 40%                 | 8                      | 8   | 8   | 8   | 7   | 7   | 40%                    | 10  | 9   | 8   | 7   | 7   | 7                      | 40% | NA  | 9   | 7   | 6   | 5  | 5  |
| 60%                 | 5                      | 5   | 5   | 5   | 5   | 5   | 60%                    | 7   | 6   | 5   | 5   | 5   | 5                      | 60% | 12  | 7   | 5   | 4   | 4  | 3  |
| 80%                 | 4                      | 4   | 3   | 3   | 3   | 3   | 80%                    | 5   | 4   | 4   | 3   | 3   | 3                      | 80% | 10  | 6   | 4   | 3   | 3  | 3  |
| 95%                 | 3                      | 3   | 3   | 3   | 2   | 2   | 95%                    | 5   | 4   | 3   | 3   | 3   | 2                      | 95% | 9   | 5   | 4   | 3   | 2  | 2  |

**Supporting Figure S3: Sensitivity of the number of years of annual treatment to achieve elimination of *Schistosoma mansoni* to the assumed mean life expectancy of the worms.** The scenarios for the relative pre-control burden in adults are shown in Figure 2 (note they have the same age-weighted overall mean worm burden). The results use the parameters for the lower transmission setting, and assume 5% systematic non-compliance. NA; Not achievable within 15 years of annual treatment.

## Reference

1. Anderson RM, May RM: Infectious diseases of humans : dynamics and control. Oxford ; New York: Oxford University Press; 1991.
2. Truscott JE, Hollingsworth TD, Brooker SJ, Anderson RM: Can chemotherapy alone eliminate the transmission of soil transmitted helminths? *Parasit Vectors* 2014, 7(1):266.
3. Anderson RM, Turner, H.C., Farrell, S.H. and Truscott, J.E.: Studies of the transmission dynamics, mathematical model development, and the control of schistosome parasites by mass drug administration in human communities. *Adv Parasitol* 2016, 94:199-246.
4. Truscott JE, Turner HC, Farrell SH, Anderson RM: Soil Transmitted Helminths: mathematical models of transmission, the impact of mass drug administration and transmission elimination criteria. *Adv Parasitol* 2016, 94:133-198.
5. Anderson R, Turner H, Farrell S, Yang J, Truscott J: What is required in terms of mass drug administration to interrupt the transmission of schistosome parasites in regions of endemic infection? *Parasit Vectors* 2015, 8(1):1-11.
6. Truscott JE, Turner HC, Anderson RM: What impact will the achievement of the current World Health Organisation targets for anthelmintic treatment coverage in children have on the intensity of soil transmitted helminth infections? *Parasit Vectors* 2015, 8(1):551.
7. Farrell S, Truscott JE, Anderson RM: The importance of patient compliance in repeated rounds of mass drug administration (MDA) for the elimination of intestinal helminth transmission. *Parasit Vectors* 2017, In press.
8. Truscott, J.E., Gurarie. D., Alsallaq, R., Toor, J., Yoon, N., Farrell, S.H., Turner, H.C., Phillips, A.E., Aurelio, H.O., Ferro, J., King, C.H., and Anderson, R.M (2017). A comparison of two mathematical models of the impact of mass drug administration on the transmission and control of schistosomiasis. *Epidemics*, 18, 29-37.
9. Anderson RM, Medley GF: Community control of helminth infections of man by mass and selective chemotherapy. *Parasitology* 1985, 90:629-660.
10. Fulford AJ, Butterworth AE, Ouma JH, Sturrock RF: A statistical approach to schistosome population dynamics and estimation of the life-span of *Schistosoma mansoni* in man. *Parasitology* 1995, 110 ( Pt 3):307-316.
11. Chan MS, Guyatt HL, Bundy DA, Booth M, Fulford AJ, Medley GF: The development of an age structured model for schistosomiasis transmission dynamics and control and its validation for *Schistosoma mansoni*. *Epidemiol Infect* 1995, 115(2):325-344.
12. Zwang J, Olliaro PL: Clinical efficacy and tolerability of praziquantel for intestinal and urinary schistosomiasis-a meta-analysis of comparative and non-comparative clinical trials. *PLoS neglected tropical diseases* 2014, 8(11):e3286.
13. de Vlas SJ, Nagelkerke NJ, Habbema JD, van Oortmarsen GJ: Statistical models for estimating prevalence and incidence of parasitic diseases. *Stat Methods Med Res* 1993, 2(1):3-21.
14. Pullan RL, Kabatereine NB, Quinnell RJ, Brooker S: Spatial and genetic epidemiology of hookworm in a rural community in Uganda. *PLoS Negl Trop Dis* 2010, 4(6):e713.
15. Anderson RM, Truscott JE, Hollingsworth TD: The coverage and frequency of mass drug administration required to eliminate persistent transmission of soil-transmitted helminths. *Philos Trans R Soc Lond B Biol Sci* 2014, 369(1645):20130435.
16. Anderson RM, May RM: Prevalence of schistosome infections within molluscan populations: observed patterns and theoretical predictions. *Parasitology* 1979, 79(01):63-94.
